# Supplementary material for: Identification of Prognostic Candidate Genes in Breast Cancer by Integrated Bioinformatic Analysis
Source: PubMed Central journal article supplement (PMC6723760; doi:10.3390/jcm8081160), 2019-08-02
Supplement: jcm-08-01160-s001.pdf [file jcm-08-01160-s001.pdf]

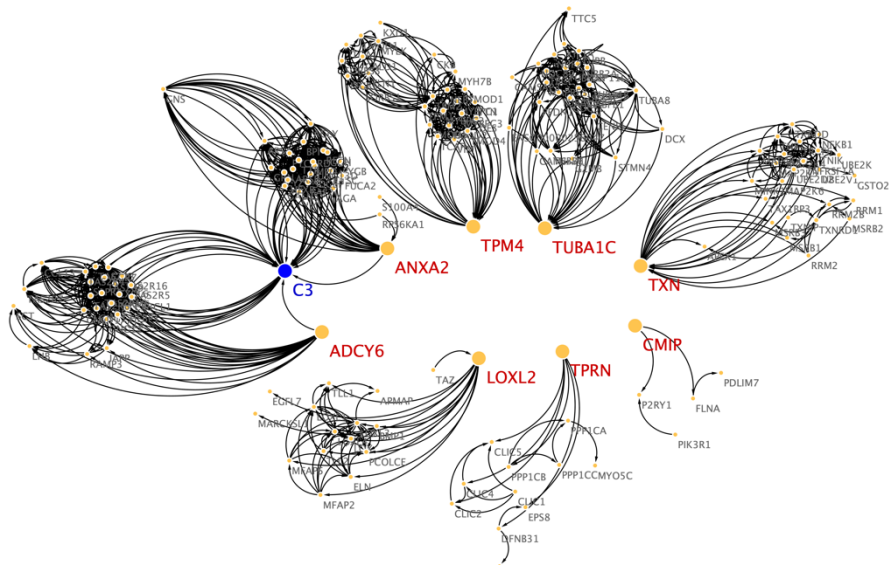

**Figure S1.** Protein-Protein network of TXN, ANXA2, TPM4, LOXL2, TPRN, ADCY6, TUBA1C and CMIP based on the STRING website. Orange is 8 key gene, blue is the connecting *ADCY6* and *ANXA2*.
